# Supplementary material for: Compared with SonoVue® LR-5, Sonazoid® modified LR-5 has better diagnostic sensitivity for hepatocellular carcinoma: a systematic review and meta-analysis
Source: PubMed Central journal article supplement — Quant Imaging Med Surg. 2024 Mar 13;14(4):2978–92. doi: 10.21037/qims-23-1616 (PMC11007517; doi:10.21037/qims-23-1616), 2024-03-13
Supplement: qims-14-04-2978-supplementary.pdf [file qims-14-04-2978-supplementary.pdf]

Table S1 Literature search strategy

| Database                                       | Search strategy                                                                                                                                                                                                                                                                                                                                                                                                                                                                                                                                                                                                                                                                                                                                                                                                                                                                                                                                                                                                   |
|------------------------------------------------|-------------------------------------------------------------------------------------------------------------------------------------------------------------------------------------------------------------------------------------------------------------------------------------------------------------------------------------------------------------------------------------------------------------------------------------------------------------------------------------------------------------------------------------------------------------------------------------------------------------------------------------------------------------------------------------------------------------------------------------------------------------------------------------------------------------------------------------------------------------------------------------------------------------------------------------------------------------------------------------------------------------------|
| Pubmed                                         | ((CEUS) OR (contrast-enhanced ultrasound)) OR (contrast enhanced ultrasound) AND (((LI-RADS) OR (LIRADS)) OR (liver imaging reporting and data system)) OR (LR-1 or LR-2 or LR-3 or LR-4 or LR-5 or LR-TIV or LR-M or LR1 or LR2 or LR3 or LR4 or LR5 or LRTIV or LRM)) AND ((HCC) OR (Carcinomas, Hepatocellular))                                                                                                                                                                                                                                                                                                                                                                                                                                                                                                                                                                                                                                                                                               |
| Embase                                         | <ol style="list-style-type: none"> <li>(LI-RADS or LIRADS). tw, kw, k f.</li> <li>(liver imaging reporting and data system). mp.</li> <li>(LR-1 or LR-2 or LR-3 or LR-4 or LR-5 or LR-TIV or LR-M or LR1 or LR2 or LR3 or LR4 or LR5 or LRTIV or LRM). tw.</li> <li>1 or 2 or 3</li> <li>exp liver cell carcinoma/</li> <li>exp contrast-enhanced ultrasound/</li> <li>(CEUS or contrast enhanced ultrasound). tw.</li> <li>6 or 7</li> <li>4 and 5 and 8</li> </ol>                                                                                                                                                                                                                                                                                                                                                                                                                                                                                                                                              |
| Medline                                        | <ol style="list-style-type: none"> <li>(LI-RADS or LIRADS). tw, kw, kf.</li> <li>(liver imaging reporting and data system).tw,kw.</li> <li>(LR-1 or LR-2 or LR-3 or LR-4 or LR-5 or LR-TIV or LR-M or LR1 or LR2 or LR3 or LR4 or LR5 or LRTIV or LRM). tw.</li> <li>1 or 2 or 3</li> <li>Radiology Information Systems/</li> <li>Carcinoma, Hepatocellular/ or Cholangiocarcinoma/</li> <li>(hepatocellular carcinoma* or hepatocellular neoplasm* or hepatocellular cancer or hepatic cell carcinoma* or HCC or cholangiocarcinoma* or hepatic nodule* or liver lesion* or adrenocortical carcinoma*). tw, kw, kf.</li> <li>Liver Neoplasms/dg</li> <li>exp Liver Diseases/dg or liver disease*. tw, kw, kf.</li> <li>Liver/dg [Diagnostic Imaging]</li> <li>liver imaging. tw, kw.</li> <li>6 or 7 or 8 or 9 or 10 or 11</li> <li>5 and 12</li> <li>4 or 13</li> <li>Ultrasonography, Doppler, Color/</li> <li>(CEUS or contrast enhanced ultrasound). tw, kw.</li> <li>15 or 16</li> <li>14 and 17</li> </ol> |
| Web of Science                                 | <ol style="list-style-type: none"> <li>((ALL=(Carcinoma, Hepatocellular)) OR ALL=(Cholangiocarcinoma)) OR ALL=(HCC)</li> <li>((ALL=(LI-RADS)) OR ALL=(LIRADS)) OR ALL=(liver imaging reporting and data system)) AND ALL=(LR-1 or LR-2 or LR-3 or LR-4 or LR-5 or LR-5V or LR-OM or LR-TIV or LR-M or LR1 or LR2 or LR3 or LR4 or LR5 or LR5v or LRTIV or LRM or LROM)</li> <li>#2 AND #1</li> <li>((ALL=(ultrasound)) OR ALL=(CEUS)) OR ALL=(contrast-enhanced ultrasound)) OR ALL=(contrast enhanced ultrasound)</li> <li>#4 AND #3</li> </ol>                                                                                                                                                                                                                                                                                                                                                                                                                                                                  |
| Cochrane Central Register of Controlled Trials | <ol style="list-style-type: none"> <li>('LI-RADS' or 'LIRADS' or 'Liver Imaging Reporting and Data System' or 'LR-1' or 'LR-2' or 'LR-3' or 'LR-4' or 'LR-5' or 'LR-5V' or 'LR-TIV' or 'LR-M' or 'LR1' or 'LR2' or 'LR3' or 'LR4' or 'LR5' or 'LRTIV' or 'LRM'): ab, ti, kw</li> <li>('Carcinoma, Hepatocellular' or 'Cholangiocarcinoma' or 'hepatocellular carcinoma*' or 'hepatocellular neoplasm*' or 'hepatocellular cancer' or 'hepatic cell carcinoma*' or 'hepatic nodule*' or 'liver lesion*' or 'liver nodule*' or 'liver neoplasm*'): ab, ti, kw</li> <li>('CEUS' or 'contrast enhanced ultrasound' or 'contrast-enhanced ultrasound'): ab, ti, kw</li> <li>1 and 2 and 3</li> <li>publication year from 2016-2023</li> </ol>                                                                                                                                                                                                                                                                          |

HCC, hepatocellular carcinoma; LI-RADS, liver imaging reporting and data system; CEUS, contrast-enhanced ultrasound.

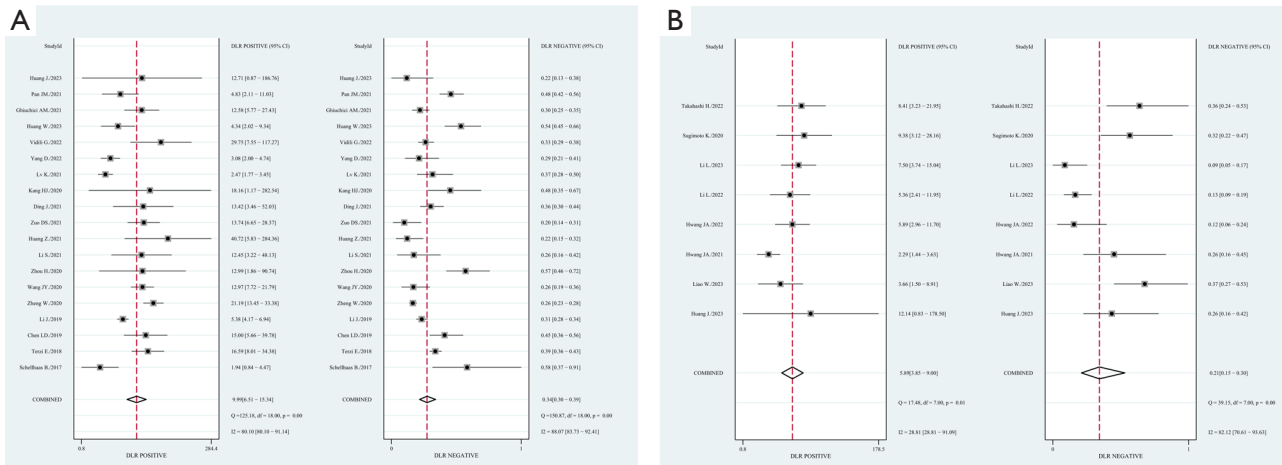

**Figure S1** Forest plots of LR-5 for HCC. (A) Pooled +LR and -LR of the SonoVue LR-5 algorithm. (B) Pooled +LR and -LR of the Sonazoid modified LR-5 algorithm. LR-5, LI-RADS category 5; HCC, hepatocellular carcinoma; +LR, positive likelihood ratio; -LR, negative likelihood ratio; LI-RADS, liver imaging reporting and data system.

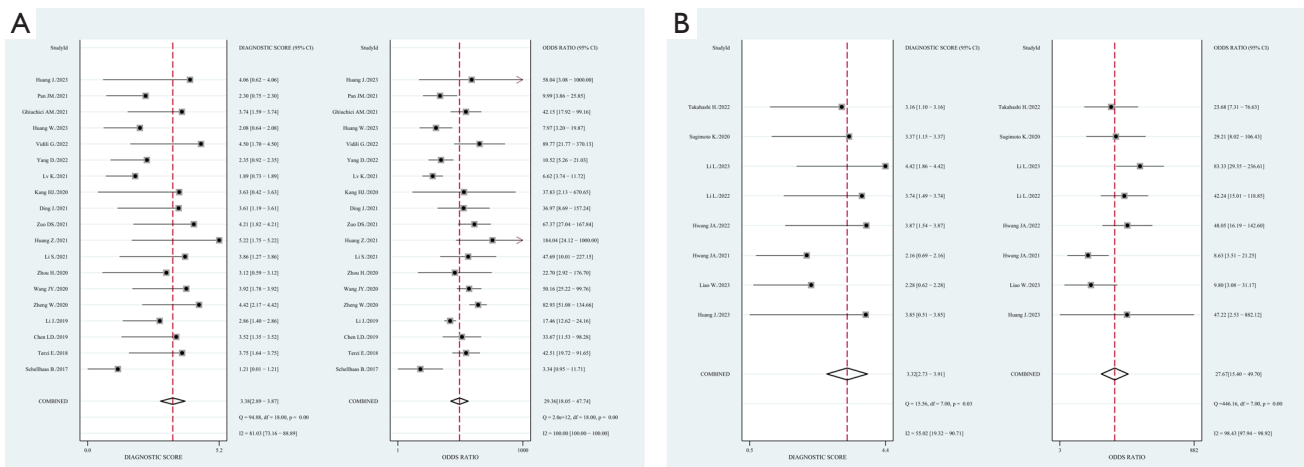

**Figure S2** Forest plots of LR-5 for HCC. (A) Pooled DOR of the SonoVue LR-5 algorithm. (B) Pooled DOR of the Sonazoid modified LR-5 algorithm. LR-5, LI-RADS category 5; HCC, hepatocellular carcinoma; DOR, diagnostic odds ratio; LI-RADS, liver imaging reporting and data system.

**Table S2** Results of the meta-regression analysis of SonoVue LR-5 for the detection of HCC

| Covariates          | Subgroup                        | Studies (n) | Meta-analysis summary estimates of SonoVue LR-5 |       |                      |      |
|---------------------|---------------------------------|-------------|-------------------------------------------------|-------|----------------------|------|
|                     |                                 |             | Sensitivity (95% CI)                            | P     | Specificity (95% CI) | P    |
| Study design        | Prospective                     | 3           | 0.53 (0.41–0.65)                                | <0.01 | 0.93 (0.83–1.00)     | 0.34 |
|                     | Retrospective                   | 16          | 0.70 (0.66–0.74)                                |       | 0.93 (0.90–0.96)     |      |
| Study type          | Cohort                          | 17          | 0.68 (0.64–0.73)                                | 0.15  | 0.92 (0.89–0.96)     | 0.69 |
|                     | Case-control                    | 2           | 0.68 (0.55–0.82)                                |       | 0.97 (0.93–1.00)     |      |
| Center              | Multi-center                    | 3           | 0.63 (0.52–0.75)                                | 0.24  | 0.92 (0.84–1.00)     | 0.18 |
|                     | Single center                   | 16          | 0.69 (0.65–0.74)                                |       | 0.93 (0.90–0.96)     |      |
| Subject enrollment* | Consecutive                     | 16          | 0.69 (0.64–0.74)                                | 0.16  | 0.93 (0.90–0.96)     | 0.04 |
|                     | Selective                       | 2           | 0.68 (0.54–0.83)                                |       | 0.97 (0.93–1.00)     |      |
| Lesions             | <100                            | 4           | 0.64 (0.53–0.75)                                | 0.19  | 0.97 (0.94–1.00)     | 0.05 |
|                     | ≥100                            | 15          | 0.69 (0.64–0.74)                                |       | 0.92 (0.89–0.96)     |      |
| LI-RADS version     | v2016                           | 2           | 0.62 (0.47–0.76)                                | 0.51  | 0.91 (0.79–1.00)     | 0.73 |
|                     | v2017                           | 17          | 0.69 (0.65–0.74)                                |       | 0.93 (0.90–0.96)     |      |
| Reference standard  | Pathology                       | 8           | 0.67 (0.60–0.73)                                | 0.01  | 0.90 (0.85–0.95)     | 0.01 |
|                     | Pathology and imaging follow-up | 11          | 0.70 (0.64–0.75)                                |       | 0.95 (0.92–0.97)     |      |

\*, the study conducted by Schellhaas et.al did not explicitly mention the subject enrollment method employed and was thus excluded from the meta-analysis. LR-5, LI-RADS category 5; HCC, hepatocellular carcinoma; CI, confidence interval; LI-RADS, liver imaging reporting and data system; v2016, version 2016; v2017, version 2017.

**Table S3** Results of the meta-regression analysis of Sonazoid modified LR-5 for the detection of HCC

| Covariates         | Subgroup                        | Studies (n) | Meta-analysis summary estimates of Sonazoid modified LR-5 |      |                      |       |
|--------------------|---------------------------------|-------------|-----------------------------------------------------------|------|----------------------|-------|
|                    |                                 |             | Sensitivity (95% CI)                                      | P    | Specificity (95% CI) | P     |
| Center             | Multi-center                    | 1           | 0.90 (0.78–1.00)                                          | 0.08 | 0.85 (0.69–1.00)     | 0.51  |
|                    | Single center                   | 7           | 0.80 (0.73–0.87)                                          |      | 0.86 (0.80–0.93)     |       |
| Lesions            | <100                            | 1           | 0.77 (0.54–1.00)                                          | 0.31 | 1.00 (1.00–1.00)     | <0.01 |
|                    | ≥100                            | 7           | 0.82 (0.75–0.89)                                          |      | 0.85 (0.79–0.92)     |       |
| LI-RADS version    | Version 1                       | 2           | 0.90 (0.86–0.95)                                          | 0.18 | 0.87 (0.76–0.92)     | 0.15  |
|                    | Version 2                       | 6           | 0.77 (0.71–0.82)                                          |      | 0.86 (0.79–0.93)     |       |
| Reference standard | Pathology                       | 2           | 0.83 (0.71–0.95)                                          | 0.12 | 0.86 (0.75–0.98)     | 0.17  |
|                    | Pathology and imaging follow-up | 6           | 0.81 (0.73–0.89)                                          |      | 0.86 (0.79–0.93)     |       |

LR-5, LI-RADS category 5; HCC, hepatocellular carcinoma; CI, confidence interval; LI-RADS, liver imaging reporting and data system.

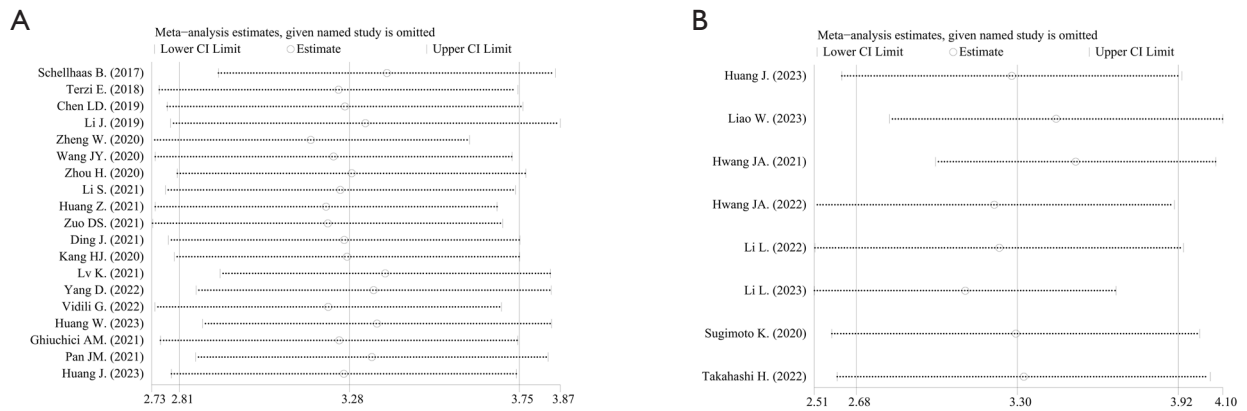

**Figure S3** Results of the sensitivity analysis of the SonoVue LR-5 and Sonazoid modified LR-5 algorithms. (A) Sonazoid LR-5 algorithm and (B) Sonazoid modified LR-5 algorithm. LR-5, LI-RADS category 5; LI-RADS, Liver Imaging Reporting and Data System.

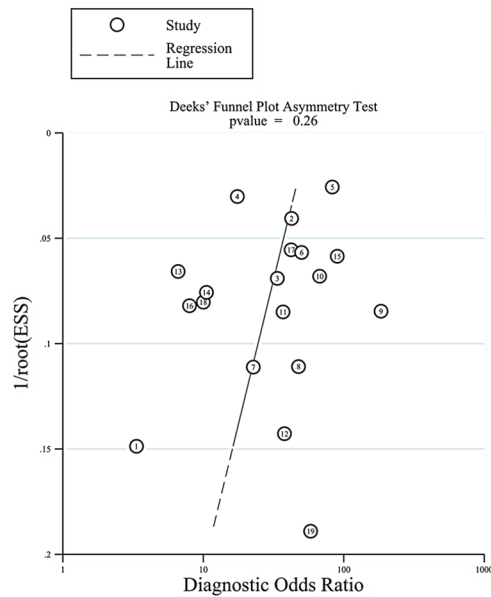

**Figure S4** Results of the publication bias and quality assessment. (A) Deeks' funnel plot of SonoVue LR-5. (B) Deeks' funnel plot of Sonazoid modified LR-5. ESS, effective sample sizes; LR-5, LI-RADS category 5; LI-RADS, liver Imaging Reporting and Data System.
